# Supplementary material
Source: PubMed Central journal article supplement (PMC2936614)
Supplement: 1008705107_pnas.201008705SI.pdf [file 1008705107_pnas.201008705SI.pdf]

# Supporting Information

Suzuki et al. 10.1073/pnas.1008705107

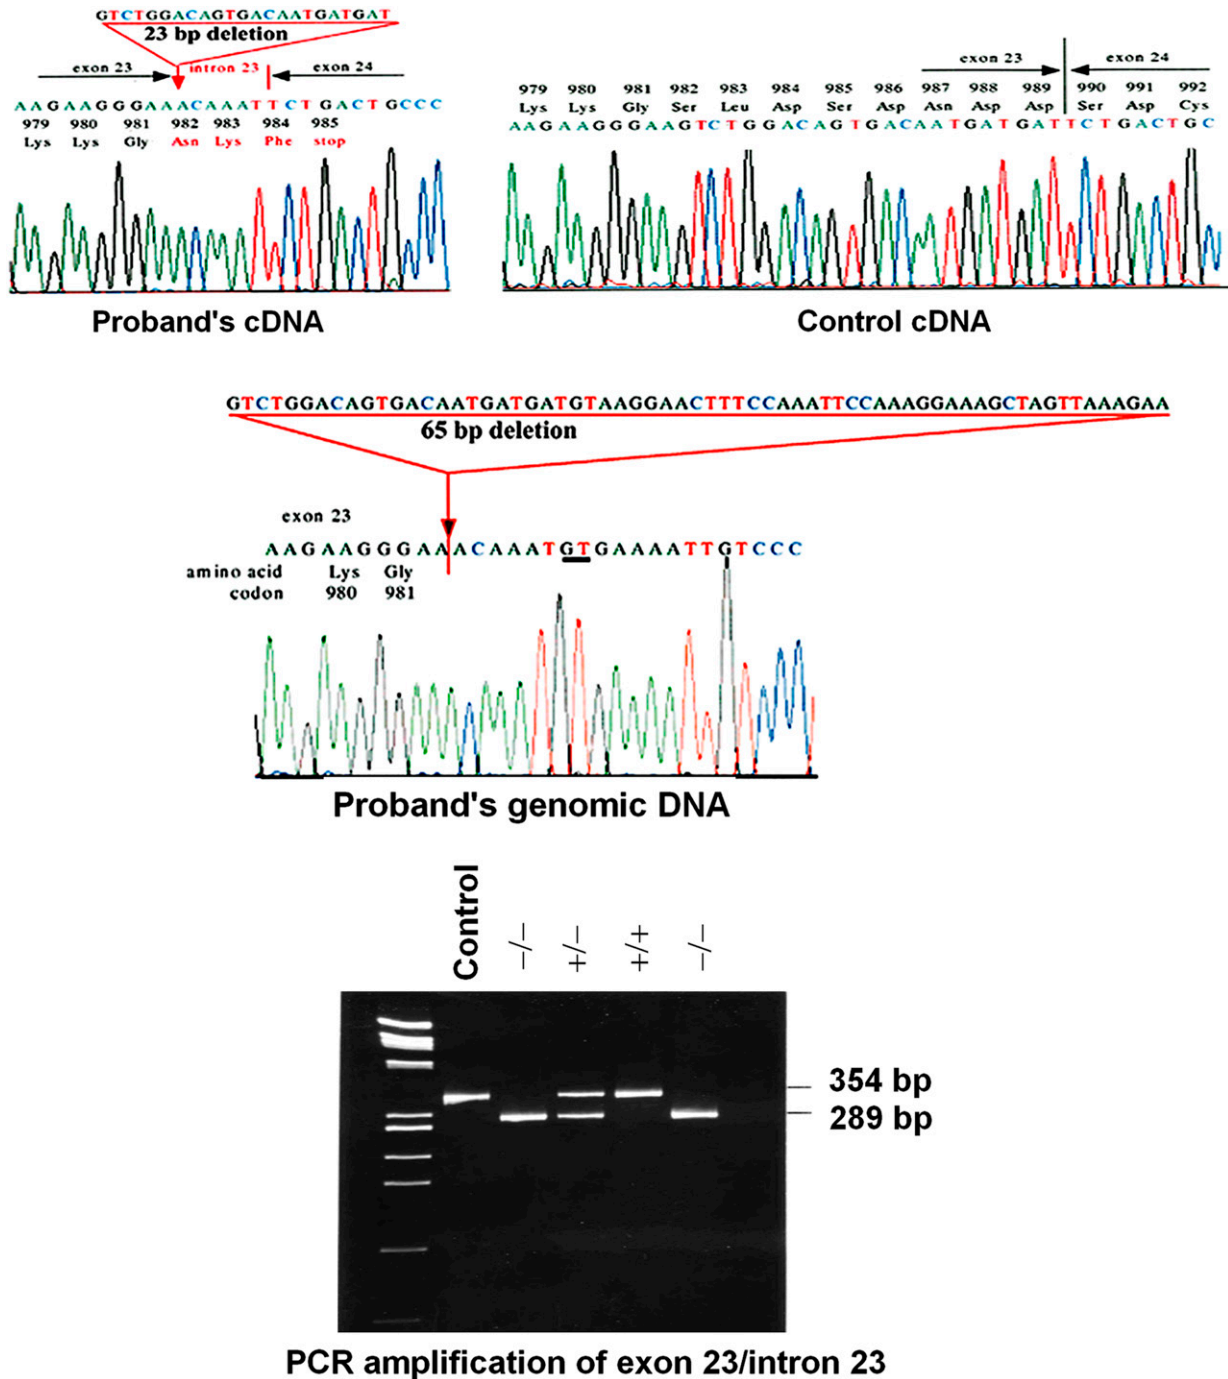

**Fig. S1.** Mutational analysis of the SLC4A4 gene. The proband's NBCe1A cDNA (top left of figure) shows a deletion of 23 bp at the end of exon 23 and an insertion of 6 bases (ACAAAT) from intron 23, followed by translation of exon 24. The control NBCe1A cDNA is also shown (top right of figure). The proband's genomic DNA (middle of figure) shows a deletion of 65 bp (23 bp from exon 23 and 42 bp from the flanking intron 23). The underlined GT is used as a new splicing donor site, which explains the translation of exon 24 after the 6 inserted bases (ACAAAT) in the proband's cDNA. PCR amplification of the exon 23/intron 23 boundary (bottom of figure) identifies family members with the homozygous mutation (–/–), the heterozygous mutation (+/–), and without the mutation (+/+).

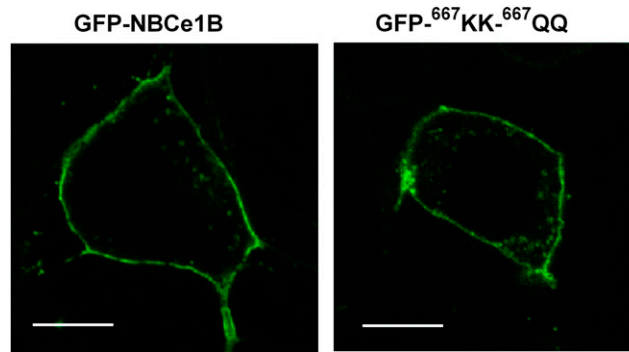

Fig. S2. Confocal images of GFP-tagged wild-type NBCe1B and the <sup>667</sup>KK-<sup>667</sup>QQ mutant transiently expressed in HEK293 cells. Scale bars, 10  $\mu$ m.

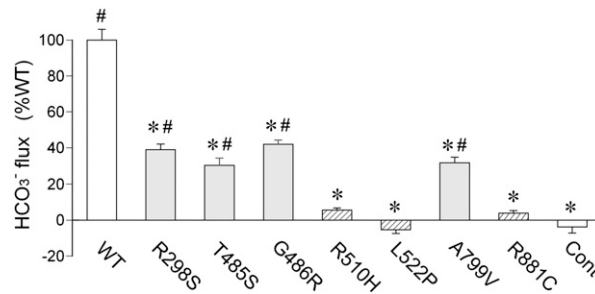

Fig. S3. Summary data for the functional analyses of NBCe1B mutants in HEK293 cells. # $P < 0.01$  vs. wild type (WT). \* $P < 0.01$  vs. Control (Cont). Hatched bars indicate the mutations associated with migraine, and gray bars the mutations not associated with migraine. Numbers observed were 24 (WT), 8 (R298S), 8 (T485S), 10 (G486R), 11 (R510H), 11 (L522P), 8 (A799V), 11 (R881C), and 11 (Cont).

Table S1. Clinical phenotypes of NBCe1 mutations

| Mutations           | Sex | Blood $\text{HCO}_3^-$ (mM) <sup>1</sup> | Short stature | Glaucoma | Membrane expression (NBCe1B) | Migraine | Migraine phenotypes |
|---------------------|-----|------------------------------------------|---------------|----------|------------------------------|----------|---------------------|
| Q29X                | F   | 9.4                                      | Yes           | Yes      | Yes                          | No       |                     |
| R298S               | F   | 8                                        | Yes           | Yes      | Yes                          | No       |                     |
| T485S               | M   | 13                                       | Yes           | No       | Yes                          | No       |                     |
| G486R               | F   | 10                                       | Yes           | No       | Yes                          | No       |                     |
| A779V               | F   | 6.3                                      | Yes           | Yes      | Yes                          | No       |                     |
| R510H               | F   | 5                                        | Yes           | Yes      | No                           | Yes      | MO                  |
| L522P               | M   | Not reported                             | Yes           | Yes      | No                           | Yes      | Hemiplegia ataxia   |
| $\Delta$ 2311A      | M   | 13.2                                     | Yes           | Yes      | No                           | Yes      | MA                  |
| R881C               | F   | 10.6                                     | Yes           | Yes      | No                           | Yes      | MO                  |
| $\Delta$ 65bp III:3 | F   | 17.3                                     | No            | Yes      | No                           | Yes      | Hemiplegia          |
| $\Delta$ 65bp III:5 | F   | 14.8                                     | No            | Yes      | No                           | Yes      | Hemiplegia stupor   |

MO, migraine without aura; MA, migraine with aura.

<sup>1</sup>Normal value = 24.
